# Supplementary material for: Antibody Banding Patterns on the Enzyme-Linked Immunoelectrotransfer Blot (EITB) Assay Clearly Discriminate Viable Cysticercosis in Naturally Infected Pigs
Source: MDPI journal article supplement (doi:10.3390/pathogens13010015), 2023-12-23
Supplement: s1 [file s1]

**Supplementary table S1.** Goodness-of-fit statistics to select the optimal number of classes for EITB banding patterns in latent class analysis.

| Information criteria | N° of latent classes |                     |                     |        |        |
|----------------------|----------------------|---------------------|---------------------|--------|--------|
|                      | 2                    | 3                   | 4                   | 5      | 6      |
| Akaike               | 2216.3               | 1785.9              | 1779.1 <sup>†</sup> | 1791.8 | 1806.3 |
| Bayes                | 2279.9               | 1883.3 <sup>†</sup> | 1901.5              | 1957.1 | 2005.5 |

<sup>†</sup>Optimal number of latent classes selected according to statistical criteria.
