# Supplementary material for: Antibody Banding Patterns on the Enzyme-Linked Immunoelectrotransfer Blot (EITB) Assay Clearly Discriminate Viable Cysticercosis in Naturally Infected Pigs
Source: MDPI journal article supplement (doi:10.3390/pathogens13010015), 2023-12-23
Supplement: s1 [file s1]

**Supplementary table S2.** Conditional class-membership probabilities for each EITB band and class prevalences obtained in the 4-latent class model.

| Glycoprotein bands | Classes <sup>†</sup> |       |      |       |
|--------------------|----------------------|-------|------|-------|
|                    | 1                    | 2     | 3    | 4     |
| GP50               | 0.39                 | 0.98  | 1.00 | 1.00  |
| GP42-39            | 0.00                 | 1.00  | 1.00 | 1.00  |
| GP24               | 0.00                 | 0.87  | 1.00 | 1.00  |
| GP21               | 0.00                 | 0.00  | 0.00 | 1.00  |
| GP18               | 0.00                 | 0.00  | 0.14 | 1.00  |
| GP14               | 0.00                 | 0.00  | 0.09 | 0.78  |
| GP13               | 0.00                 | 0.00  | 1.00 | 0.87  |
| Class prevalence   | 60.2%                | 24.8% | 4.3% | 10.7% |

<sup>†</sup>Classes: 1 (EITB-negative or only positive to the GP50 band (GP50 antigen family); 2 (Positive to antigens of the T24/42 families (GP42-39 and GP24 bands), and negative to 8-kDa antigens (GP21, GP18, GP14, and GP13); 3 (Positive to the GP50 and T24/42 antigen families, and positive to 8-kDa antigens GP18, GP14, and GP13, but negative to GP21); 4 (Positive to the GP50 and T24/42 antigen families, and positive to 8-kDa antigens GP21 and GP18).
